# Supplementary material for: Multiple Regions of Kaposi’s Sarcoma-Associated Herpesvirus ORF59 RNA are Required for Its Expression Mediated by Viral ORF57 and Cellular RBM15
Source: PubMed Central journal article supplement (PMC4353900; doi:10.3390/v7020496), 2015-02-03
Supplement: viruses-07-00496-s001.pdf [file viruses-07-00496-s001.pdf]

## Supplementary Tables

**Table S1.** Plasmids used in this study. Characteristics include antibiotics resistance (Amp<sup>r</sup>, ampicillin resistant), parent vectors, cloned inserts and brief cloning strategies. DNA oligo name and its nt position in KSHV genome (GenBank Acc. No. U75698.1) employed for individual plasmid construction are provided in Table S2.

| Plasmid                     | Characteristics                                                                                                                                    | Oligos Used to Amplify the Insert |
|-----------------------------|----------------------------------------------------------------------------------------------------------------------------------------------------|-----------------------------------|
| <b>For ORF59 expression</b> |                                                                                                                                                    |                                   |
| pJM15                       | Ap <sup>r</sup> ; pFLAG-CMV-5.1 (Sigma) with a EcoRI-BamHI insert corresponding to ORF59 with an internal deletion of ORF59 MRE element            | oJM30, oJM31, oVM88 and oVM89     |
| pJM22                       | Ap <sup>r</sup> ; pFLAG-CMV-5.1 (Sigma) with a EcoRI-BamHI insert corresponding to ORF59 with a 5' deletion of 180 nt                              | oJM44 and oVM88                   |
| pJM23                       | Ap <sup>r</sup> ; pFLAG-CMV-5.1 (Sigma) with a EcoRI-BamHI insert corresponding to ORF59 with a 5' deletion of 105 nt                              | oJM45 and oVM88                   |
| pJM30                       | Ap <sup>r</sup> ; pFLAG-CMV-5.1 (Sigma) with a EcoRI-BamHI insert corresponding to ORF59 with a 5' deletion of 312 nt                              | oJM54 and oVM88                   |
| pJM31                       | Ap <sup>r</sup> ; pFLAG-CMV-5.1 (Sigma) with a EcoRI-BamHI insert corresponding to ORF59 with a 5' deletion of 430 nt                              | oJM55 and oVM88 (                 |
| pJM32                       | Ap <sup>r</sup> ; pFLAG-CMV-5.1 (Sigma) with a EcoRI-BamHI insert corresponding to ORF59 with a 5' deletion of 560 nt                              | oJM56 and oVM88                   |
| pJM33                       | Ap <sup>r</sup> ; pFLAG-CMV-5.1 (Sigma) with a EcoRI-BamHI insert corresponding to ORF59 with a 5' deletion of 670 nt                              | oJM57 and oVM88                   |
| pJM34                       | Ap <sup>r</sup> ; pFLAG-CMV-5.1 (Sigma) with a EcoRI-BamHI insert corresponding to ORF59 with a 5' deletion of 768 nt                              | oJM58 and oVM88                   |
| pJM35                       | Ap <sup>r</sup> ; pFLAG-CMV-5.1 (Sigma) with a EcoRI-BamHI insert corresponding to ORF59 with a 5' deletion of 858 nt                              | oJM59 and oVM88                   |
| pJM36                       | Ap <sup>r</sup> ; pFLAG-CMV-5.1 (Sigma) with a EcoRI-BamHI insert corresponding to ORF59 with a 3' deletion of 123 nt                              | oVM89 and oJM60                   |
| pJM37                       | Ap <sup>r</sup> ; pFLAG-CMV-5.1 (Sigma) with a EcoRI-BamHI insert corresponding to ORF59 with a 3' deletion of 270 nt                              | oVM89 and oJM61                   |
| pJM38                       | Ap <sup>r</sup> ; pFLAG-CMV-5.1 (Sigma) with a EcoRI-BamHI insert corresponding to ORF59 with a 3' deletion of 435 nt                              | oVM89 and oJM62                   |
| pJM39                       | Ap <sup>r</sup> ; pFLAG-CMV-5.1 (Sigma) with a EcoRI-BamHI insert corresponding to ORF59 with a 3' deletion of 555 nt                              | oVM89 and oJM63                   |
| pJM40                       | Ap <sup>r</sup> ; pFLAG-CMV-5.1 (Sigma) with a EcoRI-BamHI insert corresponding to ORF59 with a 3' deletion of 681 nt                              | oVM89 and oJM64                   |
| pJM41                       | Ap <sup>r</sup> ; pFLAG-CMV-5.1 (Sigma) with a EcoRI-BamHI insert corresponding to ORF59 with a 3' deletion of 804 nt                              | oVM89 and oJM65                   |
| pJM42                       | Ap <sup>r</sup> ; pFLAG-CMV-5.1 (Sigma) with a EcoRI-BamHI insert corresponding to ORF59 with a 5' deletion of 312 nt and a 3' deletion of 270 nt. | oJM54 and oJM61                   |

**Table S2.** DNA and RNA oligos used in this study.

| Oligo Name | Position                        | Features * | Sequence                                       |
|------------|---------------------------------|------------|------------------------------------------------|
| oVM88      | KSHV ORF59 nt 95552-72          | BamHI, F   | 5'-ACTCAGGATCC/AATCAGGGGGTTAAATGTGGT-3'        |
| oVM89      | KSHV ORF59 nt 96719-39          | EcoRI, B   | 5'-TACTAGAATTCACC/ATGCCTGTGGATTTTCACTAT-3'     |
| oJM30      | KSHV ORF59 nt 96540-58/96634-52 | F          | 5'-GTAAGGGCATTCTTTATTC/GCACTACTCCGGTTTTAGT-3'  |
| oJM31      | KSHV ORF59 nt 96652-34/96558-40 | B          | 5'-ACTAAAACCGGAGTAGTGC/GAATAAAGAATGCCCTTAC-3'  |
| oJM36      | KSHV ORF59 nt 96633-09          | B          | Biotin-AAGUGCACGGAUCGGCUUGCACGCC               |
| oJM37      | KSHV ORF59 nt 96608-584         | B          | Biotin-AACCCUCAGUGUGCUGUCCAGCGUG               |
| oJM38      | KSHV ORF59 nt 96583-59          | B          | Biotin-GGGACAGCUGGCGUUCUGGGGUUAA               |
| oJM39      | KSHV ORF59 nt 96596-72          | B          | Biotin-GCUGUCCAGCGUGGGGACAGCUGGC               |
| oJM44      | KSHV ORF59 nt 96559-39          | EcoRI, B   | 5'-TACTAGAATTCACC/ATG/AGAATAAAGAATGCCCTTACG-3' |
| oJM45      | KSHV ORF59 nt 96634-17          | EcoRI, B   | 5'-TACTAGAATTCACC/ATG/CAAGTGCACGGATCGGCT-3'    |
| oJM54      | KSHV ORF59 nt 96430-12          | EcoRI, B   | 5'-TACTAGAATTCACC/ATG/CTCGACGCTGGCATAGCCT-3'   |
| oJM55      | KSHV ORF59 nt 96310-292         | EcoRI, B   | 5'-TACTAGAATTCACC/ATG/GTGGTGGACAAAAGGGTA-3'    |
| oJM56      | KSHV ORF59 nt 96181-62          | EcoRI, B   | 5'-TACTAGAATTCACC/ATG/GAGACCAAACGGTGACTGT-3'   |
| oJM57      | KSHV ORF59 nt 96070-53          | EcoRI, B   | 5'-TACTAGAATTCACC/ATG/GGCTGGGATGGTCTGAAG-3'    |
| oJM58      | KSHV ORF59 nt 95974-55          | EcoRI, B   | 5'-TACTAGAATTCACC/ATG/CTGAGACTGTGTAAGTCCC-3'   |
| oJM59      | KSHV ORF59 nt 95884-66          | EcoRI, B   | 5'-TACTAGAATTCACC/ATG/TGCCAATCAGGTGACGTAA-3'   |
| oJM60      | KSHV ORF59 nt 95672-89          | BamHI, F   | 5'-ACTCAGGATCC/GGTGACAGAGGCAGCGTC-3'           |
| oJM61      | KSHV ORF59 nt 95819-36          | BamHI, F   | 5'-ACTCAGGATCC/CTCGGCAGACACAGATCG-3'           |
| oJM62      | KSHV ORF59 nt 95984-6002        | BamHI, F   | 5'-ACTCAGGATCC/TAAGGACTCCAGGCTAACC-3'          |
| oJM63      | KSHV ORF59 nt 96104-22          | BamHI, F   | 5'-ACTCAGGATCC/GATCTTGCTCACGCCACCA-3'          |
| oJM64      | KSHV ORF59 nt 96230-47          | BamHI, F   | 5'-ACTCAGGATCC/GCCACAGAGGAGAAGCCT-3'           |
| oJM65      | KSHV ORF59 nt 96353-71          | BamHI, F   | 5'-ACTCAGGATCC/GGTGGTCTTGACGAACTGC-3'          |
| oNP41      | KSHV vIL6 nt 17498-76           | B          | Biotin-GCUUCUGACGAAGACCUUAGGAU                 |
| oNP42      | KSHV vIL6 nt 17483-59           | B          | Biotin-CUUAGGAUGGGACAUCACAGGAAGAG              |
| oZMZ296    | pEGFP-C1 nt 880-62              | B          | 5'-GCATGGCGGACTTGAAGAA-3'                      |
| oVM158     | KSHV ORF59 nt 95717-37          | F          | 5'-GGGACCAACTGGTGTGAGAGG-3'                    |
| oZMZ243    | T7 Promoter, B strand           | B          | 5'-CTATAGTGAGTCGTATTAAT-3'                     |
| oVM11      | KSHV ORF57 nt 82296-77          | B          | 5'-CTCGTCTTCCAGTGTCCGGTG-3'                    |
| ORF59-P    | KSHV ORF59 Probe                | F, TaqMan  | 5'-/56-FAM/AAACCGATCTGTGTCTGCCGAGG/3IABkFG/-3' |
| ORF59-1    | KSHV ORF59 Primer 1             | F, TaqMan  | 5'-TTAGAAGTGAAGGTGTGCC-3'                      |
| ORF59-2    | KSHV ORF59 Primer 2             | B, TaqMan  | 5'-TCCTGGAGTCCGGTATAGAATC-3'                   |
| oZMZ270    | Human GAPDH, NM_002046          | B          | 5'-TGAGTCCTTCCACGATACCAAA-3'                   |
| oST197     | Human U6                        | B          | 5'-AAAATATGGAACGCTTCACGA-3'                    |

\* F, forward; B, backward.

**Table S3.** Half-life calculation of wt ORF59 pVM18 and mt ORF59 oJM22 and oJM15 lacking the 5' MRE in the presence or absence of ORF57. Experiments in three repeats were performed as described in Figure 3D using non-linear regression analysis as shown before [15,19]. Briefly, a non-linear regression analysis on the raw data was performed, choosing an exponential decay model [Fold Percent =  $\alpha \cdot \exp(\beta \cdot \text{time})$ ] where  $\alpha$  (alpha) is the intercept when time = 0, and  $\beta$  (beta) is the decay rate. **(A)** Non-linear parameter (b) and half-life estimates ( $a = 100\% \pm 1\%$ ) present the estimated betas (Est. b), their standard errors (SE), and the two-tailed p-values for the test that the estimated betas were equal to zero according to treatment and where alpha (a) was constrained to be equal to 100%. Also shown is the adjusted R-squared (all of which indicate a satisfactory fit) and predicted half-life (hrs) for each of the treatments. **(B)** Treatment comparison results present the differences between the estimates betas, their standard errors, and the two-tailed adjusted p-values for the indicated pair-wise comparisons between the estimated betas. All but four of the comparisons were significantly different.

**A. Non-linear parameter (b) and half-life estimates (a=100%  $\pm$  1%).**

| Treatment            | Est. b | SE     | P       | Adj. R-sq. | time (1/2) |
|----------------------|--------|--------|---------|------------|------------|
| pVM18 + Empty vector | -0.403 | 0.0375 | <0.0001 | 0.87       | 1.72       |
| pVM18+ORF57          | -0.169 | 0.0321 | <0.0001 | 0.94       | 4.10       |
| pJM22 + Empty vector | -0.608 | 0.106  | 0.0001  | 0.65       | 1.14       |
| pJM22+ORF57          | -0.330 | 0.0385 | <0.0001 | 0.92       | 2.10       |
| pJM15 + Empty vector | -1.21  | 0.173  | 0.0001  | 0.72       | 0.57       |
| pJM15+ORF57          | -0.242 | 0.0424 | 0.0005  | 0.95       | 2.86       |

**B. Treatment comparison results.**

| Comparison                                    | Estimated Difference * | SE     | P**     |
|-----------------------------------------------|------------------------|--------|---------|
| pVM18 + Empty vector vs. pVM18 + ORF57        | 0.236                  | 0.0446 | <0.0001 |
| pJM22 + Empty vector vs. pJM22 + ORF57        | 0.278                  | 0.107  | 0.067   |
| pVM18 + ORF57 vs. pJM22 + ORF57               | 0.163                  | 0.0428 | 0.005   |
| pVM18 + Empty vector vs. pJM22 + ORF57        | 0.0727                 | 0.0543 | 0.22    |
| pVM18 + ORF57 vs. pVM18 + Empty vector        | 0.441                  | 0.0958 | 0.0008  |
| pVM18 + Empty vector vs. pJM22 + Empty vector | 0.205                  | 0.0990 | 0.14    |
| pJM15 + Empty vector vs. pJM15 + ORF57        | 0.986                  | 0.233  | 0.005   |
| pVM18 + ORF57 vs. pJM15 + ORF57               | 0.0706                 | 0.0423 | 0.22    |
| pVM18 + Empty vector vs. pJM15 + ORF57        | 0.169                  | 0.0569 | 0.033   |
| pVM18 + ORF57 vs. pJM15 + Empty vector        | 1.04                   | 0.219  | 0.0008  |
| pVM18 + Empty vector vs. pJM15 + Empty vector | 0.806                  | 0.186  | 0.002   |

\* Absolute estimated difference between beta's; \*\* Adjusted p-values using Holm's method.
